# Supplementary material
Source: MDPI journal article supplement (https://www.mdpi.com/2311-5637/9/10/866)
Supplement: s1 [file s1]

# Supplementary

Table S1. DNA sample detection results of *Streptomyces fradiae* sf106

| sample                               | DNA concentration<br>(ng/μl) | Total (μg) | OD260/280 | OD260/230 |
|--------------------------------------|------------------------------|------------|-----------|-----------|
| <i>Streptomyces fradiae</i><br>sf106 | 475.00                       | 23.75      | 1.84      | 2.05      |

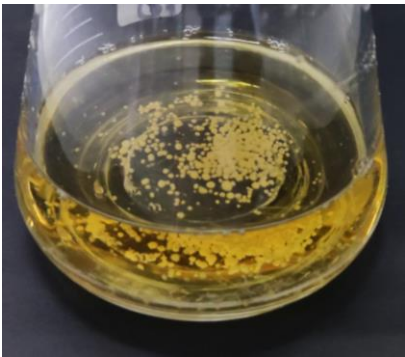

Note: Growth of strain in TSB medium.

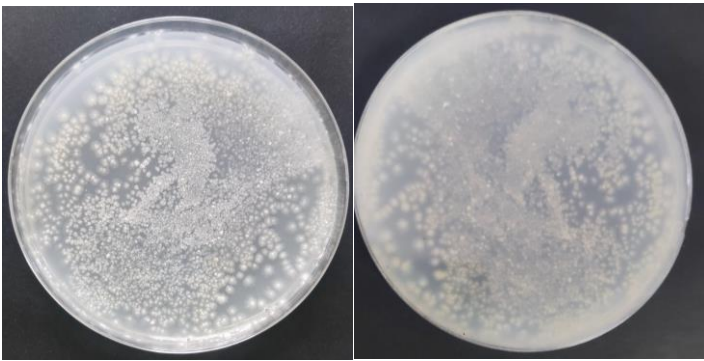

Note: Growth of strain in w1-50 medium (front side and back side, respectively).

Figure S1. Growth of *Streptomyces fradiae* sf106 on different media.
